# Supplementary material
Source: Springer Nature journal article supplement (https://www.springermedizin.de/resource/supplementary/12916_2010_286_MOESM4_ESM.pdf/9599556)

**A**

|            | AA    | CAU   | Matrigel |
|------------|-------|-------|----------|
| T47D       | 10/12 | 15/15 | 11/14    |
| MDA-MB-231 | 16/19 | 14/17 | 16/18    |

**B**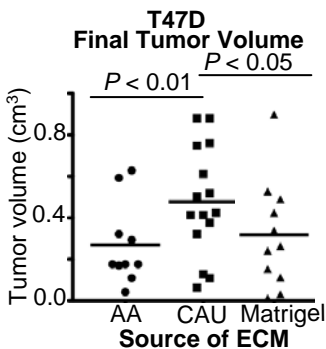**C**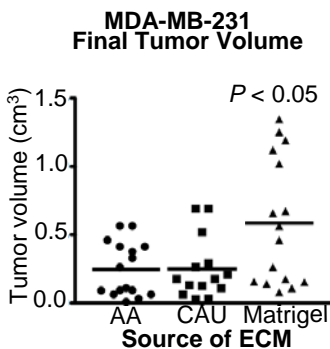**D**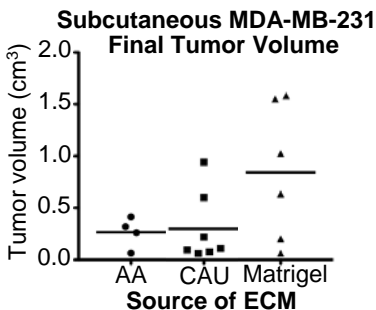

Supplement: MOESM4 [file 9599556]
